# Supplementary material
Source: PubMed Central journal article supplement (PMC1425848)
Supplement: plntcell_tpc.105.037879_4.pdf [file plntcell_tpc.105.037879_4.pdf]

CLUSTAL X (1.83) multiple sequence alignment

```

gi|3548805      MKFGKDFS---SEWQQAYVDYKYLKTLVKDINRFKRRKTLHG----- 39
gi|3548806      MKFGKEFSSQMPVEWHEAYMDYDLSQLKEIIFKRRKTNPHGPHHHHHLLHRKMTLHR 60
gi|7487574      MRFGKEFVSQMPIEWQEQAYIDYAYLKTILQDIQASRRNSDSNNQ----- 44
gi|4324975      MKFAEHLSAHITPEWRKQYIQYEAFKDMLYSAQDQAPSVEVTDEDT----- 46
gi|4176766      MKFAEHLSAHITPEWRKQYIQYEAFKDMLYSAQDQAPSVEVTDEDT----- 46
gi|6093320      MKFAEHLSAHITPEWRKQYIQYEAFKDMLYSAQDQAPSVEVTDEDT----- 46
gi|22832470     MKFAEHLSAHITPEWRKQYINYEEMKAMLYLAVEEAPSVEVEDDV----- 46
gi|3880858      MKFGEQLASHLTPWEWRKQYIDYERLKNLLYDDMMEVP----ADDDR----- 42
gi|22946878     MKFGKTLDNLMVPEWRQYMYNLYELKQIRNAVEKAPSGSRPSNDV----- 46
gi|7290442      MKFGKTYESHLTIEWRQYMYRQYDGLKELIKQGVENAPSPLTSSDYE----- 46
gi|5832411      MKFGKVEGQSVAEWASAYFDYKGGKIIAGIAKNPSEGLY----- 42
gi|28922701     MKFAKELEQEAPEWRVKYLNKLGKLIKSVTRAIQRASTPNLARRPDSLHAAPAALF 60
gi|731805       MKFADHLTESAIPWRDKYIDYKVGKKLRRYKEKLDAAEEQSSSYR----- 47
gi|731951       MRFSHFLKYNAVPEWQNHMYDSEKLNLIYTLQTDLEQVGDNEEGFG----- 47
*:*..          ** * * * *
:

gi|3548805      ---GQISLSS----- 46
gi|3548806      AFSGLISTSPKKKHHGGGGHGGHGIH----- 90
gi|7487574      --SSTPSFARNLTRYIN----- 59
gi|4324975      -----
gi|4176766      -----
gi|6093320      -----
gi|22832470     -----
gi|3880858      -----
gi|22946878     -----
gi|7290442      -----
gi|5832411      -----
gi|28922701     HHLHKKRTPQHRWSDTTPGSHGSPGADQLQSGGPELDRTPTKNNRNSKGSIEARGERS 120
gi|731805       -----
gi|731951       -----

gi|3548805      -----
gi|3548806      -----
gi|7487574      -----
gi|4324975      -----
gi|4176766      -----
gi|6093320      -----
gi|22832470     -----
gi|3880858      -----
gi|22946878     -----
gi|7290442      -----
gi|5832411      -----
gi|28922701     GLTTLPDNEVQYGSILPPSRSSDRTEFELPAPAMKIASRTGRRRDSIVASPTSPVSNRFG 180
gi|731805       -----
gi|731951       -----

gi|3548805      -----TVLEIEDGITTATIQQVSS-TASQRYETTF 75
gi|3548806      -----FSDSDDIIEGKIHVTAPILINSASHGYETTF 123
gi|7487574      -----RDALVSENHDIVVNTVTRLEEGLETAAYETTF 92
gi|4324975      -----
gi|4176766      -----
gi|6093320      -----
gi|22832470     -----
gi|3880858      -----
gi|22946878     -----
gi|7290442      -----
gi|5832411      -----TSGILGETPEEAT 55
gi|28922701     PRRTKSMAGADGQSTATSSVELPPSATIAQRSPHRLSRVLSNSHLRRTMSNRDSTAL 240
gi|731805       -----SWMPVSVYQTFQQRREPGRSDDGYRSGPAFFKDY 84
gi|731951       -----AGKSSNITDRFKNKFVFNKAKEDTSSGMNKDAGIVEET 85

gi|3548805      MTAKEGGYELVFFRRLDEFNKVEKRYREKVEVKEAAVLNKQMDALIAFRLKMK--- 132
gi|3548806      MASEEGGEYETVFFRRLDEFNKVEKRYREKVEVKEAAVLNKQMDALIAFRVKEHPD 183
gi|7487574      KAGEAGDDEFVTFRTLDREFNKVNFFYRLKVTARTEALALNKQMDALIAFRHKVMD-- 150
gi|4324975      -VKRYFAKFEKFFQTCCEKELAKINTFYSEKLEAQRFFATLQNELQSSLDAQKESTG-- 103
gi|4176766      -VKRYFAKFEKFFQTCCEKELAKINTFYSEKLEAQRFFATLQNELQSSLDAQKESTG-- 103
gi|6093320      -VKRYFAKFEKFFQTCCEKELAKINTFYSEKLEAQRFFATLQNELQSSLDVQKSSA-- 103
gi|22832470     -LKRHFANFDENFFHYCDKELKINTFYSEKLEATRKFATLNAELKTSIEESERSAK-- 103
gi|3880858      -REEHISRLDEKFNEDQDELTKINLFFSQIAEGQKHHLELQTELQVFKDVLGSRSD-- 99
gi|22946878     -AIGYYRNFEEELFFNSCRVELTKVNYFFAHKQAEHRKLATLNYQLDRRAQDPRGS-- 103
gi|7290442      -VQAYYKAFEETFLTECQSELTKVNYFFAHKQAEHRKLATLNYQLDRRAQDPRGS-- 103
gi|5832411      VKRGOIHRFHPLQFELDQANKVEEFFENLVSDARERMDLISDQVDIYKELRAFKKG-- 113
gi|28922701     QNLESVRTAETEFFFLDNELDKIETFYKQKEDQATKRLAALREQLHEMRRRTTEIA-- 298
gi|731805       SALQREPVADFIEDWLSIFQLSKCNEFWLLKEDDKFEVLQSLHYSLQKNYERDNL 144
gi|731951       IELRELPTAQTVAAKPSFRMKEKIFVYKRRSSSASSVSTANENLQDLDYTFVGDLT 145
.          .          : * :          :

gi|3548805      ----EESTVEMARFALHGVSPAELAKNP-----SMKVHMEAIIEGGSSRAGRSD 179
gi|3548806      GWPWEERTVEMTQLASDVANAAVAASTPAGARSMKVGAQAAMEAIIEGGSSKAGKSSD 243
gi|7487574      -----QNKNPVDFVDSVE 164
gi|4324975      -----VTTL----- 107
gi|4176766      -----VTTL----- 107
gi|6093320      -----VTAL----- 107
gi|22832470     -----KSKG----- 107
gi|3880858      -----TTGI----- 103
gi|22946878     -----TASR----- 107

```

gi7290442 -----DSSL----- 107  
gi5832411 -----TLES----- 117  
gi28922701 -----DAKQKEMER 308  
gi731805 NRSSSNVDMSTSLYAAG-----LAGRSDSRVNSIDSDS 177  
gi731951 E-----KQKVDDFYKRTEAKFY 162

gi3548805 E-DDYYTDEEDHNDVFFTPANNLSKMKSSSAFIEVLDSIKINNKAL-QSNTKSVLKV 237  
gi3548806 EEDDDDAEKEEDNGVSGEVSQVGRKMKAGRPPPIEVLDRVKNHTKETP-RSTIKSVLQA 302  
gi7487574 DINGSASEVGSCKTEHNVADLMRNETSNESLERIRMNKREITPLSAIKTILKV 224  
gi4324975 -----RQRR 111  
gi4176766 -----RQRR 111  
gi6093320 -----RQRR 111  
gi22832470 -----HKR- 110  
gi3880858 -----RRRF 107  
gi22946878 -----GSAS 111  
gi7290442 -----SQRA 111  
gi5832411 -----GSVLIQKQHSKLRQLDSILNFSRLQPAYHIPARK 153  
gi28922701 GSGSKSHPGDGGSGNGKDSGTWIGPLRTKFMKPGPNKALQKMETETPMAPQKPEEGD 368  
gi731805 RSMYGSMPCTKEAKKPRLLSLLAYCQKVLKDNRLPSWPKRGFSLQLDQRDASRRGRET 237  
gi731951 DKFDALVKDLKKIGVIEYDIDDDTLFNEPIASTNDEVPPLD.DDEDDDEFYDDQSNIED 222

gi3548805 SNHTELFKSRDNLKIEEKLICAFVEFHRKLWYLSYRLV-----FISENVFYQIT-SRD 291  
gi3548806 SNLTELKFSRENLRKVEAKLRRAFVEFYQKRLRLKSY----- 339  
gi7487574 HKQDELKFRDNLKEVEKRLQVAFIEFYQKRLKKNYSFLNASAVSKIMKKYDKIA-KRN 283  
gi4324975 KPVFHL SHEERVQHRNIKDLKLAFFSEFYL.SL.LLQNYQLNFTGFRKILKHKHDKILETSR 171  
gi4176766 KPVFHL SHEERVQHRNIKDLKLAFFSEFYL.SL.LLQNYQLNFTGFRKILKHKHDKILETSR 171  
gi6093320 KPVFHL SHEERVQHRNIKDLKLAFFSEFYL.SL.LLQNYQLNFTGFRKILKHKHDKILETSR 171  
gi22832470 -----HAALPDRKARELKLAFSEFYL.SL.LLQNYQLNFTGFRKILKHKHDKILRVDT 162  
gi3880858 G---GKDFHKETTRNEQQLKLAFFSEFYL.SL.LVQNFQQLNATGFRKILKHKHDKITGNER 164  
gi22946878 SWSRQPEGKRKFPF--IKKRLAMSEFYL.SL.LLQNYQLNFTGFRKILKHKHDKILETSR 169  
gi7290442 ERS-----QKKLMT--TRQLRYAIEFYLSL.LLQNYQLNETGFRKILKHKHDKIMRSLVA 164  
gi5832411 SVPTDAYTPMYSYRKLKSKLKTLLDFYDYLKLSYQYQLNQAFRKLKVKYDKTLHTLD 213  
gi28922701 YVRRPNKDDVSYRVAKRKLKALQEYRGLLELLKSYALLNRTAFRKLKVKYDKAVNARP 428  
gi731805 FAFGASLEMTTTQARNL.SNAIEEYLYLQLVKSFRDINVTGFRMVKFKDKTCHTRE 297  
gi731951 NTALLHHSQYNIKSKKSLKKSIVNLIDLCQLKSFIELNRI.GFAKITKSKDKVHLNLT 282  
\* : : : \* : : :

gi3548805 AAKSYMVMVDSKLSGSSEVMKLMENVEATFIKQFT----- 327  
gi3548806 -----SSDEVTRLVERVEATFIKHFS----- 360  
gi7487574 AAKLYMEMVDSKLSSESEVHKL.LLKVSEFIEHFS----- 319  
gi4324975 GADWRVAHVEVAPPYTCCKINQLISETAEAVTNELE----- 207  
gi4176766 GADWRVAHVEVAPPYTCCKINQLISETAEAVTNELE----- 207  
gi6093320 GADWRVIAHVEVAPPYTCCKINQLISETAEAVTNELE----- 207  
gi22832470 GAKWRQYEAESHFTNKIDININETETVTGELE----- 198  
gi3880858 GLDWRINKVEKSSFFLNREIETLITNVEVTSVINDLE----- 200  
gi22946878 GFAWYKYLKSTLAIITLQLDRMISTTENMYTDYLA----- 205  
gi7290442 AGRWVFNVDLAPFDVRLQRMITIEVEDLYTHLA----- 200  
gi5832411 QG-FWVDYMSRYTTFDFTITNQHLHVEDIYARLFT----- 248  
gi28922701 TYRYMNEKVNKTWFVNSDVVDGHIRTVEDLYARYFE----- 464  
gi731805 LTTFMSYARTHYTLFKHADANVQLVAQMQUITSSQPTPTSELSSAQRDKEPITWLETQI 357  
gi731951 RTELTIESEQFKDYAFQAEITELLNSKISQLVTFYARITDRPHN-----IS 329  
:

gi3548805 -----NGNRTKGMNLRPKPKRERHRTFS-----TVALVAIVRT 362  
gi3548806 -----NANRSKGMNLRPKAKRERHRTFST-----VVALFAIIRT 396  
gi7487574 -----NSNRRGEMSHLRPKINKERHLITFSTGFFGGCISLIVALGLIIHA 365  
gi4324975 -----DGRQKAMKRLRVPP.LGAAQAPAWTTFRVGLFCGIFIVLNLITLV 253  
gi4176766 -----DGRQKAMKRLRVPP.LGAAQAPAWTTFRVGLFCGIFIVLNLITLV 253  
gi6093320 -----DGRQKAMKRLRVPP.LGAAQAPAWTTFRVGLFCGIFIVLNLITLV 253  
gi22832470 -----GGDRQAMKRLRVPP.LGEOQSP--WTFKVLG.FSGSIVLVIVVVV 242  
gi3880858 -----AGNRQAMKRLRVPP.LSEKQKPP--LTFSLGL.FIGASII.LLAILL 244  
gi22946878 -----NGDRSEAMKRLRVPP.LGHPTPP--VHVSAGL.FLGLFVLSAICFI 249  
gi7290442 -----NGDRSLAMEKRLRVPP.LGEPTPP--SMVFRAGIAL.GMLTMLVATAI 244  
gi5832411 -----NHNKLALEHLKS--FROKE-HFSANSRFG.LL.FGAGLPLAIEAAC 291  
gi28922701 -----KGNHKVAAGKLRN--ILRRPGDASGSAFRSGLLIGF.GAVFAVQGLI 508  
gi731805 TEWFTTAL.TNSPKDRKHNTHLKKLTIQYSISEQVHRNRSIVQMLVGLGIGVSMTLI 417  
gi731951 HSKQELKSYLHDHIVWERSNTWKDML.GLLSQADELTPKETEYNANKLVGLDLEYRWPL 389  
:

gi3548805 RNILQDDGQ---KQYMNMTFPLYSLFGFIMLHMTYAAANIYWRQYRVNYSFIFGFKQG 418  
gi3548806 RNILQEEGQ---KQYMNMTFPLYSLFGFVVLHILMAGNIYWRQYRVNYSFIFGFKQG 452  
gi7487574 RNIMGTPGQ---RTYMETMFLYRF.FGVVLMHDVYAANIYWRQYRVNYSFIFGFKQG 421  
gi4324975 AAVFKLET----DRSIWPLIRIYRGGFLLIEFL.LLGINTYGWRQAGVNHVIFELNPR 308  
gi4176766 AAVFKLET----DRSIWPLIRIYRGGFLLIEFL.LLGINTYGWRQAGVNHVIFELNPR 308  
gi6093320 AAVFKLET----DRTWPLIRIYRGGFLLIEFL.LLGINTYGWRQAGVNHVIFELNPR 308  
gi22832470 SAIFHEIS----GENLKVTFRLYRGLLIEFIFLIGVNIYGNRSVGNVHVLIFELDPR 297  
gi3880858 TWIASPARP---QEPKWAVRLFRG.LL.LL.FLIFLGVNMAGWAAAGVNHVIFEVDP 300  
gi22946878 SYFVAVDTS----PEFRYTFVSLFRG.PISGVTGFC.LAINIKVYETVGNQVLI.FEVERR 304  
gi7290442 SYWKRAPL----EDHTPGLMRLFRGPFTWVIFNFYMAANVAGWQAGVNHVIFELDPR 299  
gi5832411 Y-----YNATEQSSYLLQI.WGGFLLVIFAFVLDLDCYWEKTRVNMVIFEFNRQ 342  
gi28922701 YGSELLFQDDHTLKENTSYLLQYGGF.LMILLFAL.FLACRIWTLNKINYPFIFELDTR 568  
gi731805 TYTYLIGISSEETSFTHKILFPLGWGVNMLIAFLV.LVNCFIWHRGGINYR.FMLG.EIQ 477  
gi731951 PRPILNKF.TSINWALPKLFFTKAKYIYF.IILVTGLLGIKTFDAAQHRCMALVEVCA 449  
:

gi3548805 T-----ELGYKQVLFVGF.SIGALALLCVLANLDMETDPKTKDYQALTELLPLFLLIAM 471  
gi3548806 T-----ELGYRQVLFVGLSIGV.FALLCLANLDMEDVPEKTDYQALTELLPLFLLTGM 505  
gi7487574 T-----ELGYRHVLLLSFGL.GTSLCAVLLNLDMEMDAQTKDYRLVTELPLFLLV-- 472  
gi4324975 S-----NL.SHQHLFEIAGFLG.LWCL.SLLACFFAPISVIP--TYVYPLALYGF.MVFFLI 360  
gi4176766 S-----NL.SHQHLFEIAGFLG.LWCL.SLLACFFAPISVIP--TYVYPLALYGF.MVFFLI 360

gi6093320 N-----NLHQHLEIAGLGLWCLSLACFFAPISIIIP--IYVPLALYGFVWFLLI 360  
gi22832470 N-----HLSQHLMEAAIFGVIWTL SMLSFLYSASLAIP-AFINPLTLTLMVFLA 349  
gi3880858 N-----HLSYQTLMQIASFMIMLWSFAVLAYLAHMLHIP-PFAPPLAMVVLILL 352  
gi22946878 N-----AIGAMRALEISSFFGYMCTLSLILYLLHKEFFIEDPIYIPLVQAVFVWVFL 357  
gi17290442 S-----HLQPATFLEIACFTGILWALSMLGFLYNDLIGVSDPYVPLGLLIMVGLLV 352  
gi5832411 K-----SLNWRQHLEIVGAVFFIFSLFFFLCMR--NFFPGFTIYFPALLGLVGVGFTLI 393  
gi28922701 H-----NLDWQVAEFSPFFALLGVFLWLNFSRFHWEEMYL YYPALLIGLSLLILF 621  
gi731805 SKNGTQFNDFATSKIPKLYLFTFFIVPCAVCSMLSFALEKLTPLGLYIGIVSFLF 537  
gi731951 FLWASEAIPLHITAFVLVPLVLFKVLKTS DGAIMS AASASSELAAMSSITMILLAGF 509

gi3548805 FVVLVVPFNIFYRSSRFFLTLFHMLAAPLYKVTLPDFLADQLCSQAQLRSIEFYIC 531  
gi3548806 FVVLVLPFNIFYRSSRFFLTLFHLAAPLYKVTLPDFLADQLTSQVQALRSIEFYIC 565  
gi7487574 -----VHLPDFLGDQLTSQVQALRSIEFYIC 499  
gi4324975 N-----PTKTFYKSRFWLLKLLFRVFTAPFHKVGADFADWADQLNSL SVILMDLEYMIC 415  
gi4176766 N-----PTKTFYKSRFWLLKLLFRVFTAPFHKVGADFADWADQLNSL SVILMDLEYMIC 415  
gi6093320 N-----PTKTFYKSRFWLLKLLFRVFTAPFHKVGADFADWADQLNSL SVILMDLEYMIC 415  
gi22832470 N-----PFHVL YHDARFWLWRITGRVCSAPFHFVGFADFWLGDQNSLATAILDFEYLIC 404  
gi3880858 NPI-AKPDSVFRHNSRFLWKHCYKCTSPHFVFTDFWLGDQNSLTTAFLDFQYFVC 411  
gi22946878 N-----PFRILFYSGRWLLVMGRILLSPFFVFNADFVADWADQNTSLVVTIVDHYLYVR 412  
gi7290442 V-----PLPIMNWPARWITIKLVGRVITAPLHYVGFADFWMDQNSLVSIVDHYLYVR 407  
gi5832411 AP-----VIVPYWRMRYLIQIRVFLSGLSTVHFQDFADQNSLTYACGNISLFFC 448  
gi28922701 FP-----APIFYHRARRWFLYSHYRLLLAGLYPVEFRDFLGDWICSLTYSAANIPMFFC 676  
gi731805 CPSGLIPYWDKVVHTRKWLVTIRLMSGFFPVEFGDFLGDII CSLTYASIDIAMFFC 597  
gi731951 TLGEVLAQYNIKVLASWLLAFAGCKPRNVLLMAMCVVFLSMWISNVAAPVLTYSLLSP 569

gi3548805 YYGWDFKQRK-----NTCKDSQVNTFLFIVSAFPFFSRFLQ 569  
gi3548806 HYGWGDYKRI-----NTCTESDAYNAFLIVAVIPVSRLLQ 603  
gi7487574 YYGWDFYRFR-----NTCTSNIGFRFTFYIVAVIPYWRLLQ 538  
gi4324975 FYSLELKWID-----ESKGLLPNNSEESGICHKYTYGVRVAVQCPAWLRFIQ 462  
gi4176766 FYSLELKWID-----ESKGLLPNNSEESGICHKYTYGVRVAVQCPAWLRFIQ 462  
gi6093320 FYSFELKWID-----ESKGLLPNDPQEPFCHKYTYGVRVAVQCPAWLRFIQ 462  
gi22832470 FYFTNGWIT-----EAR-----DASICMEKDFIIRP VCNCLPAWFRFAQ 443  
gi3880858 FYATEVDYSNGWIEVKGINSTTGSVPWGSVELSNGKQDCASAAGLRSLMSIIPAMIRFLQ 471  
gi22946878 FYVRYFLDRS-----VNNCFEPDVMVPIITMCLPGWFRFAQ 443  
gi7290442 FYAISWLRDR-----VNNCFEPDVMVPIITMCLPGWFRFAQ 443  
gi5832411 LYKRLWRPQ-----LCNSSHSPLLGFFTLPLGLRVFQ 482  
gi28922701 LYANEDWQP-----MCNSSHRLQGFNALLPPIWRALQ 710  
gi731805 VYSHTPNLLCG-----SSHSRAMGLVSLCSPYWRFMQ 629  
gi731951 LLDAMDADSPFAQALVLG-----VALAANIIGMSSPISSPQNIISM 611

gi3548805 CMRRMLEE--KNIEQGYNGFKYIVIVVAVCLGMAYEVDD--KDRQIWRLLGGITSAM 624  
gi3548806 CLRRLEFEE--KNPEQGYNGLYKYLTIIVAVCLRTYSVDE--DNQFIWRILAGIFSAT 656  
gi7487574 CIRRMVED--RDL SHGNGIKYLLTIVAASLRATYTLNR-----GSNWNITAWVFSGV 589  
gi4324975 CLRRYRDT-KRAFPHLVNAGYSTTFMVFALYSTHKE-RGHSOTMVFYLVIVFYII 520  
gi4176766 CLRRYRDT-KRAFPHLVNAGYSTTFMVFALYSTHKE-RGHSOTMVFYLVIVFYII 520  
gi6093320 CLRRYRDT-KRAFPHLVNAGYSTTFMVFALYSTHKE-QNHSOTVVFYLVWVFCII 520  
gi22832470 CLRRYRDS-REAFPHLVNAGYSTTFMVFIFATLKSFSHPNYASTFDNPTWLVIIASIV 502  
gi3880858 CLRRYRDT-KRVPHLVNAGYSTTFVAVACGALNKYYEA-TDPNTTSIFFYIWLISYIM 529  
gi22946878 -----  
gi7290442 CLRRFRDSGSKSMSYLINAGKYSTTFLVVLFLRRNSEGGYANTFSPNYTWLFLSSCVV 503  
gi5832411 CFRRYSDS-LKSFPHLVNAGKYSTTFLVVLFLRRNSEGGYANTFSPNYTWLFLSSCVV 534  
gi28922701 CLRRYHDT-KNVFPHLVNAGKYSTTFLVVLFLRRNSEGGYANTFSPNYTWLFLSSCVV 762  
gi731805 CLRRFADS-GDWPHLVNAGKYSTTFLVVLFLRRNSEGGYANTFSPNYTWLFLSSCVV 682  
gi731951 YLKPYGIWGWQFAVALLPSGILAMLLWILLFTTFKMKIKLEKFKPKTKFTKYQYII 671

gi3548805 AVVFCTYWDLVYDWGLLNRTSK-----NPWLRDNLIPHKVYVVLAMILNV 670  
gi3548806 AAIFCTYWDLVYDWGLLNRTSK-----NPWLRDNLIPHKVYVVLAMILNV 702  
gi7487574 ATFYGYWDLVYDWGLLQGRCK-----NSFLRDKLLVPHKTYVYAAVMLNV 635  
gi4324975 SSCYTLIWDLKMWDGLFDKNAG-----ENTFLREEIVYPQKAYYCAIIEVD 567  
gi4176766 SSCYTLIWDLKMWDGLFDKNAG-----ENTFLREEIVYPQKAYYCAIIEVD 567  
gi6093320 SSCYTLIWDLKMWDGLFDKNAG-----ENTFLREEIVYPQKAYYCAIIEVD 567  
gi22832470 SSCYATYWDIKMWDGLFDKNAG-----ENTFLREEVYSSSTGFYFFAILDEL 549  
gi3880858 SFYTYFLWDIFMDWGLIDPRAPK-----EARFLREEMIGSKWYVYMAIAQDF 577  
gi22946878 -----DAFEFEPDYAVAWVYFVIVENT 445  
gi7290442 ATIYCYLWDVIRDFGLFRIMRG-----ERIFLRKQLVYVYQAFYFVIVENL 549  
gi5832411 NSLFSYTWDLMDWNLVLRKDG-----RWQFREHRLKQLWYVYIAMIENL 580  
gi28922701 NACYTTIWDLMDWNLVLRKDG-----RWQFREHRLKQLWYVYIAMIENL 808  
gi731805 NSILTSAMDWMDWSFAHNTSYNWLRRDDL YLAKKNWENGYSFSRKL VYFAMIWIDI 742  
gi731951 TVYVATILLWCVESQIEGAFSSGQIAIPIVLFVFGTGLLSTQDLNAPFWSIVILAMGGI 731

gi3548805 VLRFAWMQTVLDFK--FESIHTQTVAVVASLEIIRRGWVFRLLLRTHI----- 719  
gi3548806 LLRFQWLVQVDFN--FSFMHRQTMVAVVSLLEIIRRGWVFRLENEHNLNVGKYRAF 760  
gi7487574 LLRLVWLQTVLDFK--FSLHRETMWALMACLEIIRRGWVFRLENEHNLNVGKYRAF 693  
gi4324975 ILRFQWLVQVDFN--FESIHTQTVAVVASLEIIRRGWVFRLLLRTHI----- 719  
gi4176766 ILRFQWLVQVDFN--FESIHTQTVAVVASLEIIRRGWVFRLLLRTHI----- 719  
gi6093320 ILRFQWLVQVDFN--FESIHTQTVAVVASLEIIRRGWVFRLLLRTHI----- 719  
gi22832470 ALRFQWLVQVDFN--FESIHTQTVAVVASLEIIRRGWVFRLLLRTHI----- 719  
gi3880858 VLRFAWMQTVLDFK--FESIHTQTVAVVASLEIIRRGWVFRLLLRTHI----- 719  
gi22946878 LLRCVWILEFALVH--QELIAPYNGKSLICFSEIARRFFWVFLRLENEHNLNVGKYRAF 503  
gi7290442 VLRLFWAVEFTILY--HNLMTYPMRTISSILEIIRRGWVFRLLLRTHI----- 719  
gi5832411 IYRSSIFYCIFPN--HIQHSSTISFFVTLAEIMRRCMNLVREHEEYIYRNLRAAR 637  
gi28922701 LLRFQWLVQVDFN--FESIHTQTVAVVASLEIIRRGWVFRLLLRTHI----- 719  
gi731805 LRFQWLVQVDFN--FESIHTQTVAVVASLEIIRRGWVFRLLLRTHI----- 719  
gi731951 ALGKAVSSGLLSTIAKALQKIEENDGVFALLCIFGILMLVGVGTVSHVSAIIIPLVQ 791

gi3548805 -----

gi3548806 TVPLPFNYDEDDDKGN----- 776  
gi7487574 TVPLPFNYEEDGDHNN----- 710  
gi4324975 DISVAPLNADDQTLLEQMMDDQDGVRRNQKNRSWKYNQSI SLRRPRLASQSKARDTKVLI 687  
gi4176766 DISVAPLNADDQTLLEQMMDDQDGVRRNQKNRSWKYNQSI SLRRPRLASQSKARDTKVLI 687  
gi6093320 DISVAPLNADDQTLLEQMMDDQDGVRRNQKNRSWKYNQSI SLRRPRLASQSKARDTKVLI 682  
gi22832470 DISIAPLDS SDQALILRLMDEADGVINRYTKANRPKPKVKDPEKRSLLQTRGSLPDLRI 667  
gi3880858 DISVKPIRKGDLSSLKMDQMDGVTHRGQDLMERVKKKKSAKASRQLLRKNRFRMIA 695  
gi22946878 DIFITRLDPQEEFLESVMDNTEDLG-----REKLNKKYF----- 538  
gi7290442 DIHLAALNPRQERMLESMDSDGVSNNRKSNERIRLKGKEYF----- 649  
gi5832411 ELKPLDFVKPHSDVFSHQISSDKNYTDEEDSMDQTDVDEAQFS----- 682  
gi28922701 DTPLPYQLDQFVERPSQETSAGELEAETGTTGAVQEQERRGTISSMAASIRERIRGVSVA 925  
gi731805 DAPLPYPIAQVGDSDMSDDLGSKAFSSLNDIPITPSHDNNPHSFAEPMPAYRGTFRRRS 859  
gi731951 EVGDKLGNPKAAPILVFGCALLSSCGMLASSGFPNVTASIKVDRKGDYLSVMTFLTRG 851

gi3548805 -----  
gi3548806 -----  
gi7487574 -----  
gi4324975 EDTDDEANT----- 696  
gi4176766 EDTDDEANT----- 696  
gi6093320 EDTDDEANT----- 691  
gi22832470 DMDSKKL----- 674  
gi3880858 AAPVVTTFIDTTNT----- 710  
gi22946878 -----  
gi7290442 -----  
gi5832411 -----  
gi28922701 GATSPWAASPSPATGAHPPEEGAI SPHAESGATSGEGATGTGFSLSGGGFRRRHVE 985  
gi731805 SVFENISRSIPWAHATDFQRPTVNTVDDRSPE TDESEVESIM----- 902  
gi731951 VPASILAFLCVITLGYIMASVVKGNATSA----- 881

gi3548805 -----  
gi3548806 -----  
gi7487574 -----  
gi4324975 -----  
gi4176766 -----  
gi6093320 -----  
gi22832470 -----  
gi3880858 -----  
gi22946878 -----  
gi7290442 -----  
gi5832411 -----  
gi28922701 SMGKKSILQVMAE AHKQDFEKRPPSEAVREQGLGRGGSSLVDEDEEDDDDPDLRSEV 1045  
gi731805 -----  
gi731951 -----

gi3548805 -----  
gi3548806 -----  
gi7487574 -----  
gi4324975 -----  
gi4176766 -----  
gi6093320 -----  
gi22832470 -----  
gi3880858 -----  
gi22946878 -----  
gi7290442 -----  
gi5832411 -----  
gi28922701 EDDDEDDSDRRSVQDRMEAREAEMLVKRARGEPPDSDVSE 1087  
gi731805 -----  
gi731951 -----
