# Supplementary material
Source: PubMed Central journal article supplement (PMC1425848)

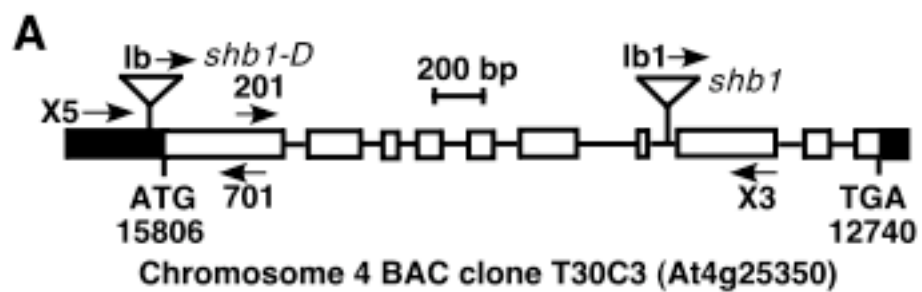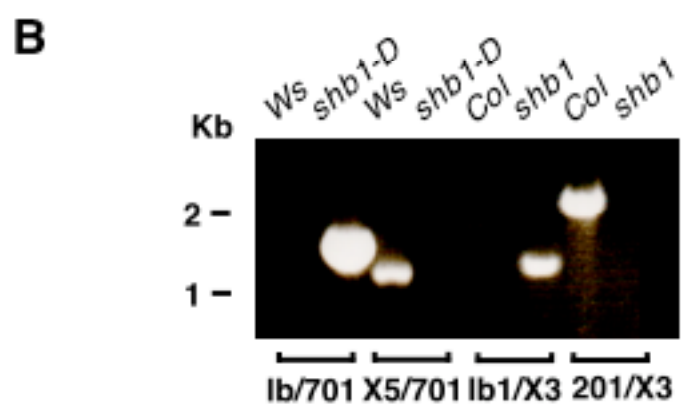

Supplement: plntcell_tpc.105.037879_1.pdf [file plntcell_tpc.105.037879_1.pdf]

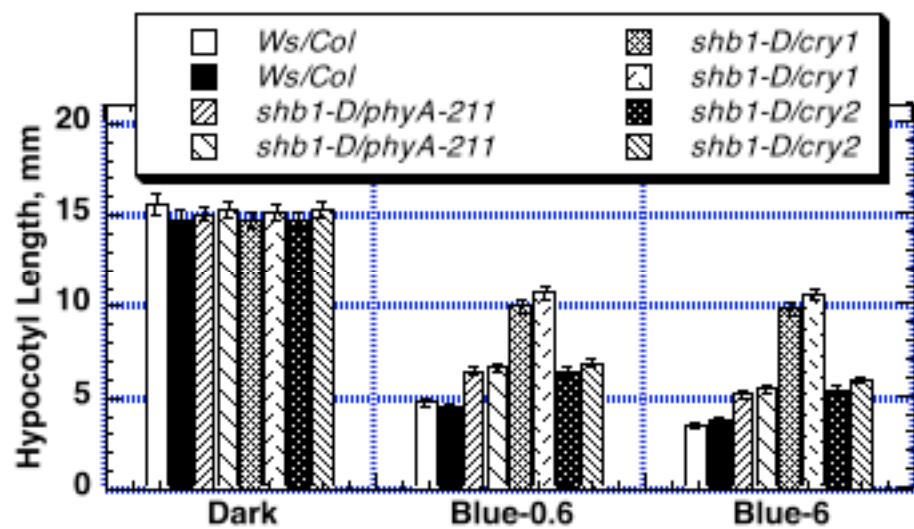

Supplement: plntcell_tpc.105.037879_2.pdf [file plntcell_tpc.105.037879_2.pdf]

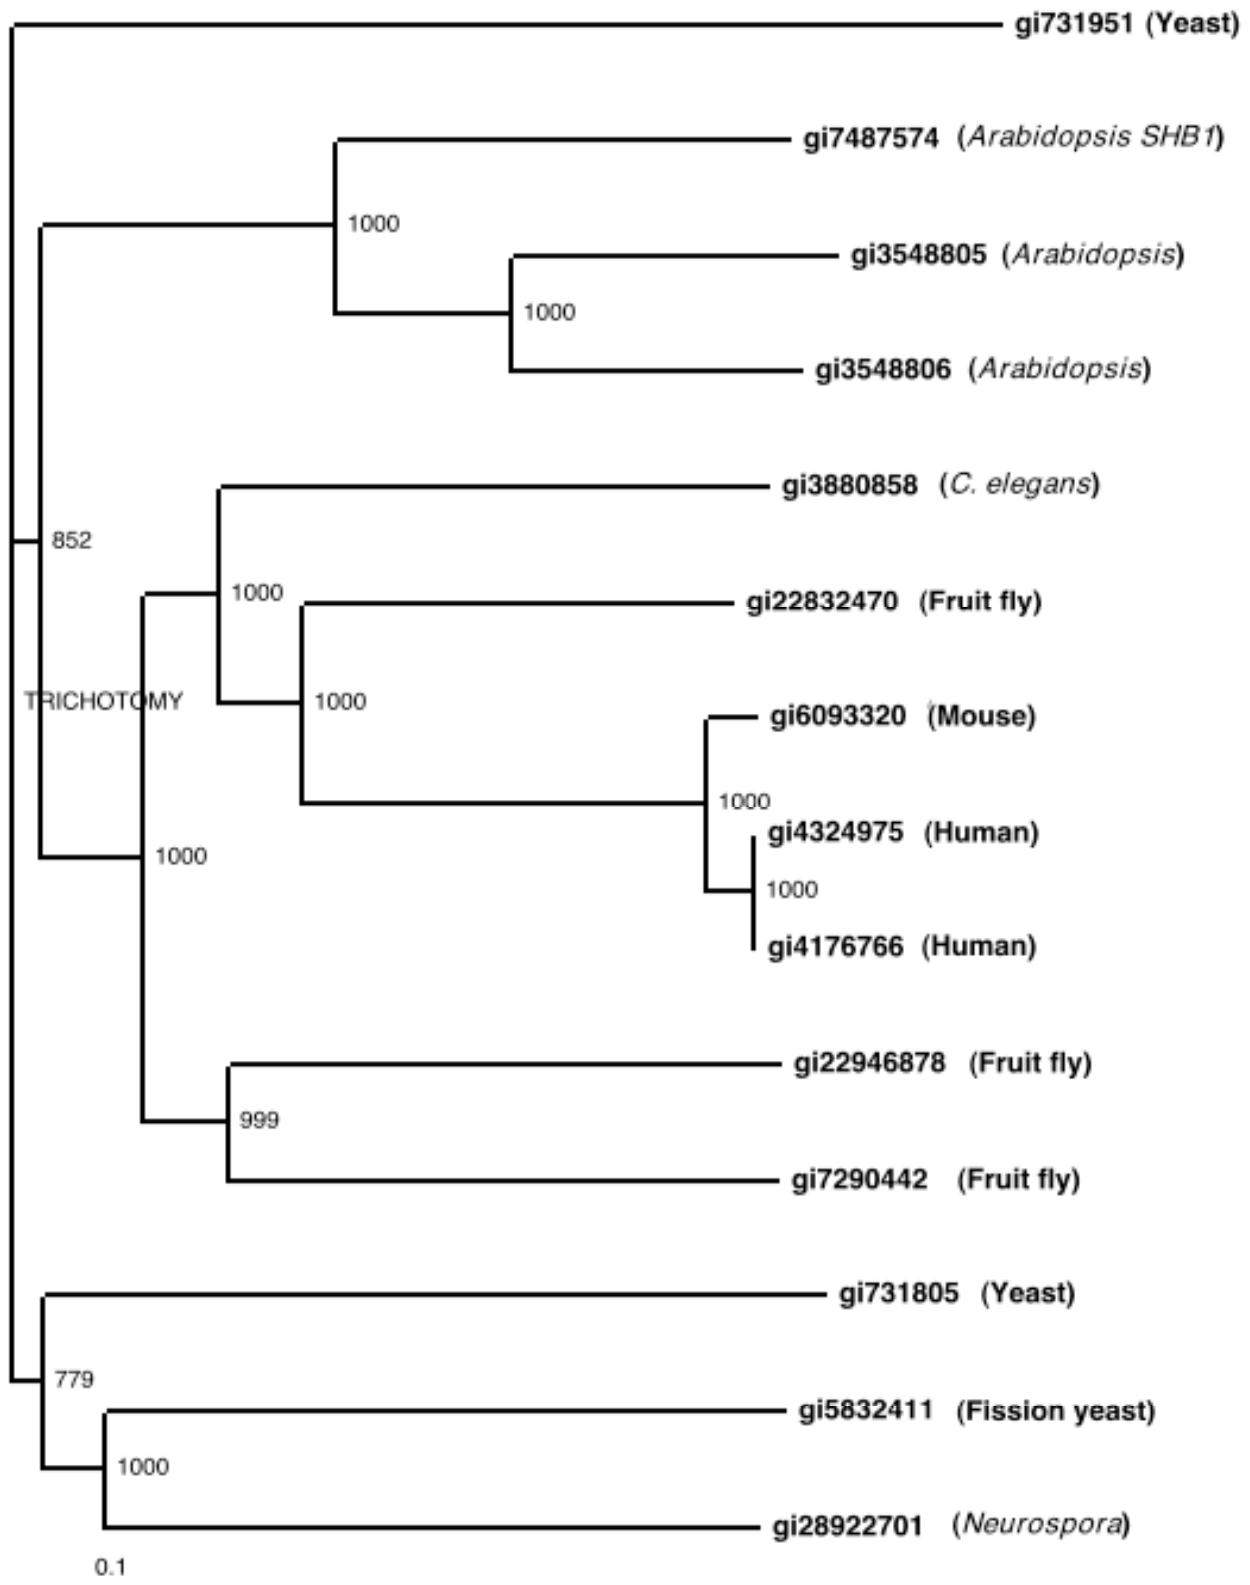

Supplement: plntcell_tpc.105.037879_3.pdf [file plntcell_tpc.105.037879_3.pdf]

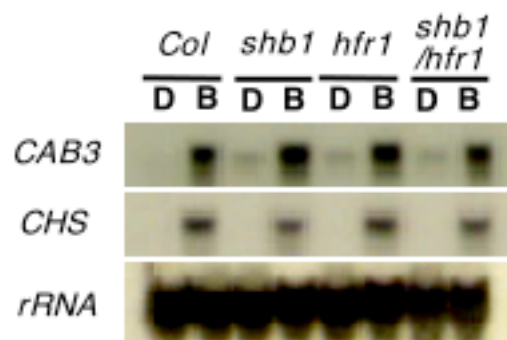

Supplement: plntcell_tpc.105.037879_6.pdf [file plntcell_tpc.105.037879_6.pdf]
